# Supplementary material
Source: PubMed Central journal article supplement (PMC9722642)
Supplement: NIHMS1840097-supplement-1.pdf [file NIHMS1840097-supplement-1.pdf]

1 **Supplementary Figures**

Supp\_Fig. 1

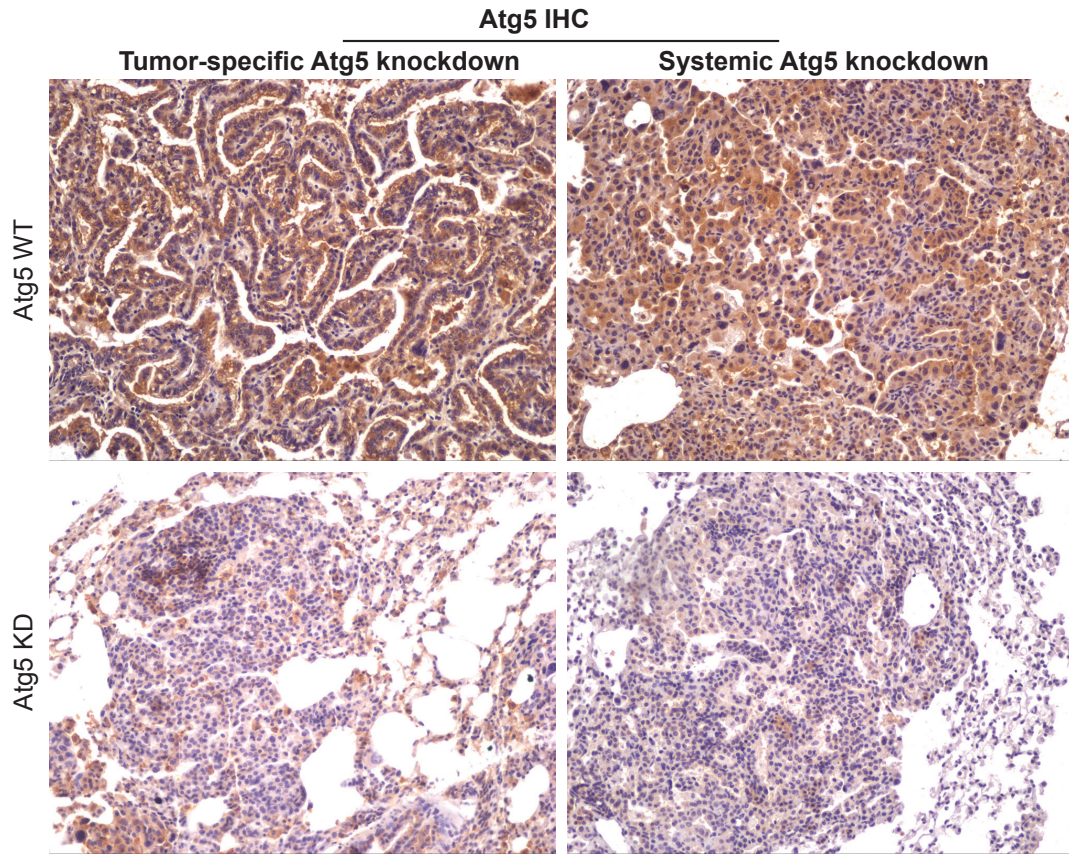

2

3 **Supplementary figure 1.** Representative immunohistochemistry (IHC) for Atg5 of the lung tumors from  
4 WT mice, tumor specific-Atg5 knockdown mice and systemic Atg5 knockdown mice at low magnification.

5

6

7

8

9

10

Supp. Fig. 2

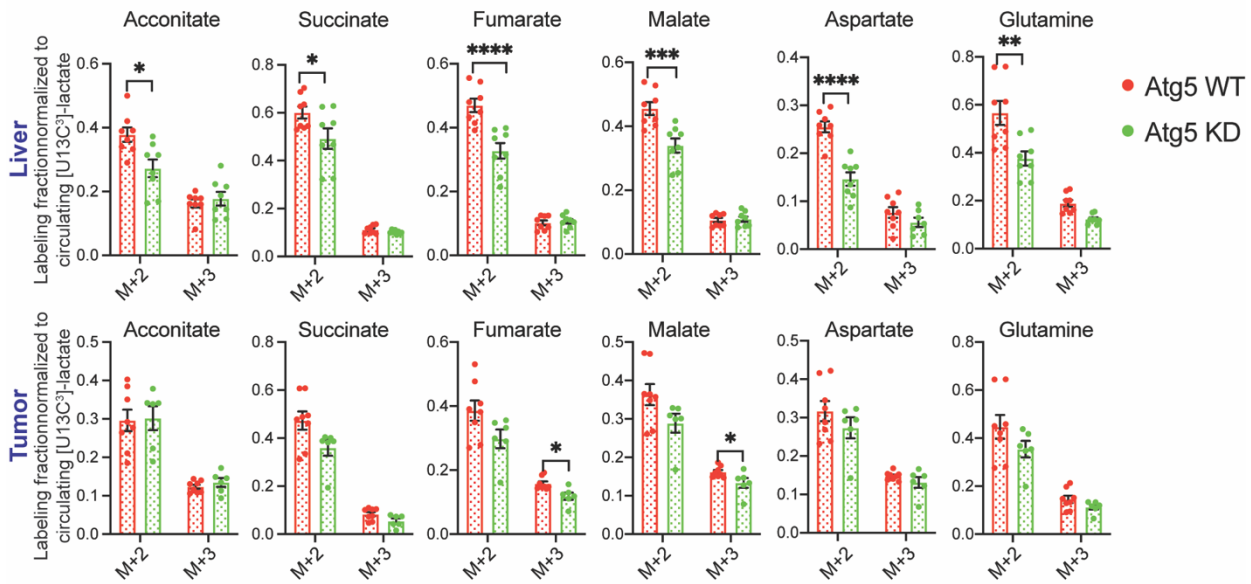

1

2 **Supplementary figure 2. Carbon contribution from lactate to TCA cycle metabolites of liver and**  
 3 **lung tumors in WT and systemic Atg5 knockdown mice.**

4 M+2, and M+3 isotopomers fractions of TCA cycle metabolites in liver and lung tumors of WT and  
 5 systemic Atg5 knockdown mice in fasted state.

6 Labeling fraction are normalized to circulating serum  $[U^{13}C_3]$ -lactate. Data are mean  $\pm$  s.e.m. n.s.,

7  $P > 0.05$ ; \*  $P < 0.05$ ; \*\*  $P < 0.01$ ; \*\*\*  $P < 0.005$ ; \*\*\*\*  $P < 0.001$

8

1

### Supp.\_Fig. 3

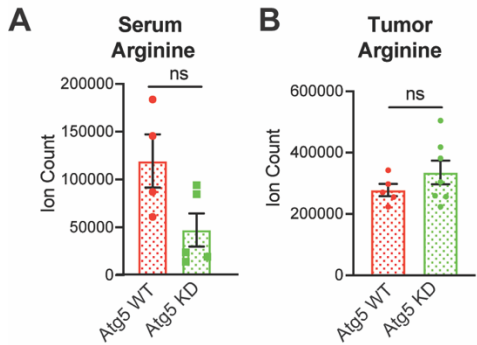

2

3 **Supplementary figure 3. Short-term systemic Atg5 knockdown does not alter circulating and**  
4 **tumor arginine levels.**

5 A. Serum arginine level of WT and systemic Atg5 knockdown mice after 6 weeks' Dox treatment.

6 B. Level of arginine in KP lung tumors of WT and systemic Atg5 knockdown mice after 6 weeks' Dox  
7 treatment.

8 Data are mean  $\pm$  s.e.m. n.s.,  $P > 0.05$ .
